# Supplementary material for: Simple Webserver-Facilitated Method to Design and Synthesize Artificial miRNA Gene and Its Application in Engineering Viral Resistance
Source: MDPI journal article supplement (doi:10.3390/plants11162125), 2022-08-15
Supplement: s1 [file s1]

# Supplementary Materials

**Data S1. Fasta format sequences of artificial miRNA expression vector pAMIR-PLRV derived from pK7LIC1.0.**

**>pAMIR-PLRV**

```
GGTACCCTCGAATTATCATACATGAGAATTAAGGGAGTCACGTTATGACCCCCGCCGATGACGCGGGACA
AGCCGTTTTACGTTTGGAACTGACAGAACCGCAACGTTGAAGGAGCCACTCAGCCGCGGGTTTCTGGAGT
TTAATGAGCTAAGCACATACGTCAGAAACCATTATTGCGCGTTCAAAAGTCGCCTAAGGTCACTATCAGC
TAGCAAATATTTCTTGTCAAAAATGCTCCACTGACGTTCCATAAATTCCCCTCGGTATCCAATTAGAGTC
TCATATTCACCTCTCAACTCGATCGAGGCATGATTGAACAAGATGGATTGCACGCAGGTTCTCCGGCCGCT
TGGGTGGAGAGGCTATTCGGCTATGACTGGGCACAACAGACAATCGGCTGCTCTGATGCCGCCGTGTTCC
GGCTGTCAGCGCAGGGGCGCCCGGTTCTTTTTGTCAAGACCGACCTGTCCGGTGCCCTGAATGAACTCCA
AGACGAGGCAGCGCGGCTATCGTGGCTGGCCACGACGGGCGTTCCCTGCGCAGCTGTGCTCGACGTTGTC
ACTGAAGCGGGAAGGGACTGGCTGCTATTGGGCGAAGTGCCGGGGCAGGATCTCCTGTCATCTCACCTTG
CTCCTGCCGAGAAAGTATCCATCATGGCTGATGCAATGCGGCGGCTGCATACGCTTGATCCGGCTACCTG
CCCATTTCGACCACCAAGCGAAACATCGCATCGAGCGAGCACGTACTCGGATGGAAGCCGGTCTTGTCGAT
CAGGATGATCTGGACGAAGAGCATCAGGGGCTCGCGCCAGCCGAACTGTTCCGCCAGGCTCAAGGCGCGGA
TGCCCCGACGGCGAGGATCTCGTCGTGACCCACGGCGATGCCTGCTTGCCGAATATCATGGTGGAAAATGG
CCGCTTTTCTGGATTTCATCGACTGTGGCCGGCTGGGTGTGGCGGACCGCTATCAGGACATAGCGTTGGCT
ACCCGTGATATTGCTGAAGAGCTTGGCGGCGAATGGGCTGACCGCTTCCTCGTGCTTTACGGTATCGCCG
CTCCCGATTTCGAGCGCATCGCCTTCTATCGCCTTCTTGACGAGTTCTTCTGAGCGGGACTCTGGGGTTC
GGACTCTAGCTAGAGTCAAGCAGATCGTTCAAACATTTGGCAATAAAGTTTCTTAAGATTGAATCCTGTT
GCCGGTCTTGCGATGATTATCATATAATTTCTGTTGAATTACGTTAAGCATGTAATAATTAACATGTAAT
GCATGACGTTATTTATGAGATGGGTTTTTATGATTAGAGTCCCAGCAATTATACATTTAATACGCGATAGA
AAACAAAATATAGCGCGCAAACTAGGATAAAATTATCGCGCGCGGTGTCATCTATGTTACTAGATCGACCG
GCATGCAAGCTGATAATTCAATTCGGCGTTAATTCAGTACATTAAAAACGTCCGCAATGTGTTATTAAGT
TGTCTAAGCGTCAATTTGTTTACACCACAATATATCCTGCCACCAGCCAGCCAACAGCTCCCCGACCGGC
AGCTCGGCACAAAATCACCCTCGATACAGGCAGCCCATCAGTCCGGGACGGCGTCAGCGGGAGAGCCGT
TGTAAGGCGGCAGACTTTGCTCATGTTACCGATGCTATTCGGAAGAACGGCAACTAAGCTGCCGGGTTTG
AAACACGGATGATCTCGCGGAGGGTAGCATGTTGATTGTAACGATGACAGAGCGTTGCTGCCTGTGATCA
ATTCGGGCACGAACCCAGTGGACATAAGCCTCGTTCGGTTCGTAAGCTGTAATGCAAGTAGCGTAACTGC
CGTCACGCAACTGGTCCAGAACCTTGACCGAACGCAGCGGTGGTAACGGCGCAGTGGCGGTTTTTCATGGC
TTCTTGTTATGACATGTTTTTTTTGGGGTACAGTCTATGCCTCGGGCATCCAAGCAGCAAGCGCGTTACGC
CGTGGGTGATGTTTGATGTTATGGAGCAGCAACGATGTTACGCAGCAGGGCAGTCGCCCTAAAACAAAG
TTAAACATCATGGGGGAAGCGGTGATCGCCGAAGTATCGACTCAACTATCAGAGGTAGTTGGCGTTCATCG
AGCGCCATCTCGAACCGACGTTGCTGGCCGTACATTTGTACGGCTCCGCAGTGGATGGCGGCCTGAAGCC
ACACAGTGATATTGATTTGCTGGTTACGGTGACCGTAAGGCTTGATGAAACAACGCGGCGAGCTTTGATC
AACGACCTTTTGGAACTTCGGCTTCCCCGAGAGAGCGAGATTCTCCGCGCTGTAGAAGTCACCAATTG
TTGTGCACGACGACATCATTCGTTGGCGTTATCCAGCTAAGCGCGAACTGCAATTTGGAGAATGGCAGCG
CAATGACATTCTTGCAGGTATCTTCGAGCCAGCCACGATCGACATTGATCTGGCTATCTTGCTGACAAAA
GCAAGAGAACATAGCGTTGCCTTGGTAGGTCCAGCGGCGGAGGAACCTCTTTGATCCGGTTCCTGAACAGG
ATCTATTTGAGGCGCTAAATGAAACCTTAACGCTATGGAACTCGCCGCCCGACTGGGCTGGCGATGAGCG
```

AAATGTAGTGCTTACGTTGTCCCGCATTTGGTACAGCGCAGTAACCGGCAAAATCGCGCCGAAGGATGTC  
GCTGCCGACTGGGCAATGGAGCGCCTGCCGGCCAGTATCAGCCCGTCATACTTGAAGCTAGACAGGCTT  
ATCTTGGACAAGAAGAAGATCGCTTGGCCTCGCGCGCAGATCAGTTGGAAGAATTTGTCCACTACGTGAA  
AGGCGAGATCACCAAGGTAGTCGGCAAATAATGTCTAGCTAGAAATTCGTTCAAGCCGACGCCGCTTCGC  
CGGCGTTAACTCAAGCGATTAGATGCACTAAGCACATAATTGCTCACAGCCAACTATCAGGTCAAGTCT  
GCTTTTATTATTTTAAAGCGTGCATAATAAGCCCTACACAAATTGGGAGATATATCATGCATGACCAAAA  
TCCCTTAACGTGAGTTTTTCGTTCCACTGAGCGTCAGACCCCGTAGAAAAGATCAAAGGATCTTCTTGAGA  
TCCTTTTTTTCTGCGCGTAATCTGCTGCTTGCAAACAAAAAAACCACCGCTACCAGCGGTGGTTTGTGTTG  
CCGGATCAAGAGCTACCAACTCTTTTTCCGAAGGTAAGTGGCTTCAGCAGAGCGCAGATACCAATACTG  
TCCTTCTAGTGTAGCCGTAGTTAGGCCACCACTTCAAGAACTCTGTAGCACCGCCTACATACCTCGCTCT  
GCTAATCCTGTTACCAGTGGCTGCTGCCAGTGGCGATAAGTCGTGTCTTACCGGGTTGGACTCAAGACGA  
TAGTTACCGGATAAGGCGCAGCGGTCCGGGCTGAACGGGGGGTTCGTGCACACAGCCCAGCTTGGAGCGAA  
CGACCTACACCGAACTGAGATACCTACAGCGTGAGCTATGAGAAAGCGCCACGCTTCCCGAAGGGAGAAA  
GGCGGACAGGTATCCGGTAAGCGGCAGGGTCGGAACAGGAGAGCGCACGAGGGAGCTTCCAGGGGGAAAC  
GCCTGGTATCTTTATAGTCCTGTCCGGTTTCGCCACCTCTGACTTGAGCGTCGATTTTTGTGATGCTCGT  
CAGGGGGGCGGAGCCTATGGAAAAACGCCAGCAACCGGGCCTTTTTACGGTTCCTGGCCTTTTGTGGCC  
TTTTGCTCACATGTTCTTTCTGCGTTATCCCTGATTCTGTGGATAACCGTATTACCGCCTTTGAGTGA  
GCTGATACCGCTCGCCGCGAGCCGAACGACCGAGCGCAGCGAGTCAGTGAGCGAGGAAGCGGAAGAGCGCC  
TGATGCGGTATTTTCTCCTTACGCATCTGTGCGGTATTTACACCGCATATGGTGCACTCTCAGTACAAT  
CTGCTCTGATGCCGCATAGTTAAGCCAGTATACACTCCGCTATCGCTACGTGACTGGGTCATGGCTGCGC  
CCCACACCCGCCAACACCCGCTGACGCGCCCTGACGGGCTTGCTGCTCCCGGCATCCGCTTACAGACA  
AGCTGTGACCGTCTCCGGGAGCTGCATGTGTCAGAGGTTTTACCGTCATCACCGAAACGCGCGAGGCAG  
GGTGCCTTGATGTGGGCGCCGGCGGTGAGTGGCGACGGCGCGGCTTGTCGCGGCCCTGGTAGATTGCCT  
GGCCGTAGGCCAGCCATTTTTGAGCGGCCAGCGGCCGCGATAGGCCGACGCGAAGCGGCGGGGCGTAGGG  
AGCGCAGCGACCGAAGGGTAGGCGCTTTTTGCAGCTCTTCGGCTGTGCGCTGGCCAGACAGTTATGCACA  
GGCCAGGCGGGTTTTAAGAGTTTTAATAAGTTTTAAAGAGTTTTAGGCGGAAAAATCGCCTTTTTTCTCT  
TTTATATCAGTCACTTACATGTGTGACCGGTTCCCAATGTACGGCTTTGGGTTCCTCAATGTACGGGTTC  
GGTTCCCAATGTACGGCTTTGGGTTCCTCAATGTACGTGCTATCCACAGGAAAGAGACCTTTTCGACCTTT  
TTCCCCTGCTAGGGCAATTTGCCCTAGCATCTGCTCCGTACATTAGGAACCGGCGGATGCTTCGCCCTCG  
ATCAGGTTGCGGTAGCGCATGACTAGGATCGGGCCAGCCTGCCCCGCTCCTCCTTCAAATCGTACTCCG  
GCAGGTCATTTGACCCGATCAGCTTGCGCACGGTGAAACAGAACTTCTTGAACCTCTCCGGCGCTGCCACT  
GCGTTCGTAGATCGTCTTGAACAACCATCTGGCTTCTGCCTTGCTGCGGCGCGGCTGCCAGGCGGTAG  
AGAAAACGGCCGATGCCGGGATCGATCAAAAAGTAATCGGGGTGAACCGTCAGCACGTCCGGGTCTTGTC  
CTTCTGTGATCTCGCGGTACATCCAATCAGCTAGCTCGATCTCGATGTACTCCGGCCGCCCGGTTTTCGCT  
CTTTACGATCTTGTAGCGGCTAATCAAGGCTTCACCTCGGATACCGTCACCAGGCGGCCGTTCTTGCC  
TTCTTCGTACGCTGCATGGCAACGTGCGTGGTGTTTAACCGAATGCAGGTTTCTACCAGGTCGTCTTTCT  
GCTTTCCGCCATCGGCTCGCCGGCAGAACTTGAGTACGTCCGCAACGTGTGGACGGAAACACGCGGCCGGG  
CTTGTCTCCCTTCCCTTCCCGGTATCGGTTTCATGGATTTCGGTTAGATGGGAAACCGCCATCAGTACCAGG  
TCGTAATCCCACACACTGGCCATGCCGGCCGGCCCTGCGGAAACCTCTACGTGCCCCGTCTGGAAGCTCGT  
AGCGGATCACCTCGCCAGCTCGTCCGGTCACGCTTCGACAGACGGAAAACGGCCACGTCCATGATGCTGCG  
ACTATCGCGGGTGCCACGTATAGAGCATCGGAACGAAAAAATCTGGTTGCTCGTCGCCCTTGGGCGGC  
TTCCTAATCGACGGCGCACCGGCTGCCGGCGGTTGCCGGGATTCTTTGCGGATTTCGATCAGCGGCCGCTT

GCCACGATTACCGGGGCGTGCTTCTGCCTCGATGCGTTGCCGCTGGGCGGCCTGCGCGGCCTTCAACTT  
CTCCACCAGGTCATCACCCAGCGCCGCGCGATTGTACCGGGCCGGATGGTTTTCGACCGTCACGCCGA  
TTCCTCGGGCTTGGGGGTTCAGTGCCATTGCAGGGCCGGCAGACAACCCAGCCGCTTACGCCTGGCCAA  
CCGCCCCGTTCTCCACACATGGGGCATTCCACGGCGTCGGTGCTGGTTGTTCTTGATTTTCCATGCCGC  
CTCCTTTAGCCGCTAAAATTCATCTACTCATTTTATTCATTTGCTCATTTACTCTGGTAGCTGCGCGATGT  
ATTAGATAGCAGCTCGGTAATGGTCTTGCCCTGGCGTACCGCGTACATCTTCAGCTTGGTGTGATCCTC  
CGCCGGCAACTGAAAGTTGACCCGCTTCATGGCTGGCGTGTCTGCCAGGCTGGCCAACGTTGCAGCCTTG  
CTGCTGCGTGCGCTCGGACGGCCGGCACTTAGCGTGTTTGTGCTTTTGTCTCATTTTCTCTTTACCTCATT  
AACTCAAATGAGTTTTGATTTAATTTTCAGCGGCCAGCGCCTGGACCTCGCGGGCAGCGTCGCCCTCGGGT  
TCTGATTCAAGAACGGTTGTGCCGGCGGGCAGTGCTGGGTAGCTCACGCGCTGCGTGATACGGGACT  
CAAGAATGGGCAGCTCGTACCCGGCCAGCGCCTCGGCAACCTCACCGCCGATGCGCGTGCTTTGATCGC  
CCGCGACACGACAAAGGCCGCTTGTAGCCTTCCATCCGTGACCTCAATGCGCTGCTTAACCAGCTCCACC  
AGGTGGCGGTGGCCCATATGTCTGAAGGGCTTGGCTGCACCGGAATCAGCACGAAGTCGGCTGCCCTGA  
TCGCGGACACAGCCAAGTCCGCCGCTGGGGCGCTCCGTCGATCACTACGAAGTCGCGCCGGCCGATGGC  
CTTCACGTGCGGGTCAATCGTCGGGCGGTTCGATGCCGACAACGGTTAGCGGTTGATCTTCCCGCACGGCC  
GCCAATCGCGGGCACTGCCCTGGGGATCGGAATCGACTAACAGAACATCGGCCCCGGCGAGTTGCAGGG  
CGCGGGCTAGATGGGTTCGATGGTTCGTCTTGCTGACCCGCTTTCTGGTTAAGTACAGCGATAACCTT  
CATGCGTTCCCCCTTGCGTATTTGTTTATTTACTCATCGCATCATATACGCAGCGACCGCATGACGCAAGC  
TGTTTTACTCAAATACACATCACCTTTTTAGACGGCGCGCTCGGTTTCTTCAGCGGCCAAGCTGGCCGG  
CCAGGCCGCCAGCTTGGCATCAGACAAACCGGCCAGGATTTTCATGCAGCCGCACGGTTGAGACGTGCGCG  
GGCGGCTCGAACACGTACCCGGCCGCGATCATCTCCGCTCGATCTCTTCGGTAATGAAAAACGGTTTCGT  
CCTGGCCGTCTGGTGCGGTTTCATGCTTGTTCTCTTGCGGTTTCATTCTCGGCGGCCGCCAGGGCGTCG  
GCCTCGGTCAATGCGTCCTCACGGAAGGCACCGCGCCGCTGGCCTCGGTGGGCGTCACTTCCCTCGCTGC  
GCTCAAGTGCGCGGTACAGGGTCGAGCGATGCACGCCAAGCAGTGACGCCGCTCTTTCACGGTGCGGCC  
TTCCTGGTCGATCAGCTCGCGGGCGTGCGGATCTGTGCCGGGGTGAGGGTAGGGCGGGGGCCAACTTC  
ACGCCTCGGGCCTTGGCGGCCTCGCGCCCGCTCCGGGTGCGGTTCGATGATTAGGGAACGCTCGAACTCGG  
CAATGCCGGCGAACACGGTCAACACCATGCGGCCGGCCGGCGTGGTGGTGTCGGCCCACGGCTCTGCCAG  
GCTACGCAGGCCCCGCGCCGGCCTCCTGGATGCGCTCGGCAATGTCCAGTAGGTTCGCGGGTGCTGCGGGCC  
AGGCGGTCTAGCCTGGTCACTGTCAACAGTCGCCAGGGCGTAGGTGGTCAAGCATCCTGGCCAGCTCCG  
GGCGGTGCGCCTGGTGCCGGTGATCTTCTCGGAAAAACAGCTTGGTGACCCGGCCGCGTGCAAGTTCCGGC  
CCGTTGGTTGGTCAAGTCTGGTCGTGCTGACGCGGGCATAGCCAGCAGGCCAGCGGCGGGCGCTC  
TTGTTTCATGGCGTAATGTCTCCGTTCTAGTCGCAAGTATTCTACTTTATGCGACTAAAACACGCGACAA  
GAAAACGCCAGGAAAAGGGCAGGGCGGCAGCCTGTGCGGTAACCTAGGACTTGTGCGACATGTCGTTTTTC  
AGAAGACGGCTGCACTGAACGTGAGAAGCCGACTGCACTATAGCAGCGGAGGGGTGGATCAAAGTACTT  
TGATCCCCGAGGGGAACCTGTGGTTGGCATGCACATACAAATGGACGAACGGATAAACCTTTTTCAGCCC  
TTTTAAATATCCGTTATTCTAATAAACGCTCTTTTCTCTTAGGTTTACCCGCCAATATATCCTGTCAAAC  
ACTGATAGTTTAACTGAAGGCGGGAAACGACAATCTGATCCAAGCTCAAGCTAAGCTTGAGCTCTCCCA  
TATGGTCGACTAGAGCCAAGCTGATCTCCTTTGCCCGGAGATCACCATGGACGACTTCTCTATCTCTA  
CGATCTAGGAAGAAAGTTTCGACGGAGAAGGTGACGATACCATGTTTACCACCGATAATGAGAAGATTAGC  
CTCTTCAATTTTCAGAAAGAATGCTGACCCACAGATGGTTAGAGAGGCCTACGCGGCAGGTCTCATCAAGA  
CGATCTACCCGAGTAATAATCTCCAGGAGATCAAATACCTTCCCAAGAAGGTTAAAGATGCAGTCAAAAG  
ATTCAGGACTAACTGCATCAAGAACACAGAGAAAGATATATTTCTCAAGATCAGAAGTACTATTCCAGTA

TGGACGATTCAAGGCTTGCTTCATAAACCAAGGCAAGTAATAGAGATTGGAGTCTCTAAGAAAGTAGTTC  
 CTA CTGAATCAAAGGCCATGGAGTCAAAAATTCAGATCGAGGATCTAACAGAACTCGCCGTGAAGACTGG  
 CGAACAGTTCATACAGAGTCTTTTACGACTCAATGACAAGAAGAAAATCTTCGTCAACATGGTGGAGCAC  
 GACACTCTCGTCTACTCCAAGAATATCAAAGATACAGTCTCAGAAGACCAAAGGGCTATTGAGACTTTTC  
 AACAAAGGGTAATATCGGGAAACCTCCTCGGATTCCATTGCCCAGCTATCTGTCACTTCATCAAAAGGAC  
 AGTAGAAAAGGAAGGTGGCACCTACAAATGCCATCATTGCGATAAAGGAAAGGCTATCGTTCAAGATGCC  
 TCTGCCGACAGTGGTCCCAAAGATGGACCCCCACCCACGAGGAGCATCGTGAAAAAGAAGACGTTCCAA  
 CCACGTCTTCAAAGCAAGTGGATTGATGTGATGATATCATCTCCACTGACGTAAGGGATGACGCACAATC  
 CCACTATCCTTCGCAAGACCCTTCTCTATATAAGGAAGTTCATTTTCAATTTGGAGAGGACTCCGGTATTT  
 TTACAACAATACCACAACAAAACAAACAACAAACAACATTACAATTTACTATTCTAGTCGACCTGCAGGC  
 GGCCGCAACAACACTAGTCCAGGGCGCCCTCACCAAACAAAACCTCACAATGAGAGAGTCCCTGTTCTGGAT  
 TGCGGATGAGAATCCTTTTCTTACCTGACCACACACGTAGATATACATTATTCTCTCATGATTAAAGGATT  
 CTCCTCCGCAACCCAGATCAGTACTCTCTCGTCAACCAAAGTAAGTAATCACACATAAGAGCTTGGCGGC  
 GAATCACCAAACCTCCACCAACAATGGGTGAGATTCTCCATTCTCTTGAATGCCGGACAGTCTGTAACCA  
 ACAACACGAAATCCGTTCATTTTGCTTATTACAGACTGTCAGGCATTCCAGAGAATGAGCACTTCACCC  
 CAATACCATTACCCAACAGAACTCTGAGCACCCAGTCCGCCCACCACCGTCACAGCCAAATACACAGAGT  
 CCCTGTTCTCTGGTTATACAACCGAGCAATTCACCTCTGACCACACACAAGTATTATATATACAGTCTCT  
 ACTTTAATTGCTCGGTCTGATAACAAGAGATCAGTACTCTGTGTAACACAAACCGCAAACATTCTACCCA  
 GCCACAACGTCTATATCCACCACCCACAACTACTCGGCACAGAATGACGATTCTCAAGCTGGTTATA  
 CAACCGATAACCAAACTCACGAAATCCGTCTACAGTTCTTATTATCGGTTGTACAACCAGCCTGAGAAT  
 CTCCTCTTGTGCCAAACCATCAATCCCAACTAATCAAGGGCGTCGGGTCGAGTGGCAGTGAAGGGCGAAC  
 AGTTCTGATTAACCACAAACCGTTCTACTTTACTGGCTTTGGTCGTCATGAAGATGCGGACTTGCGTGG  
 CAAAGGATTCGATAACGTGCTGATGGTGCACGACCACGCATTAATGGACTGGATTGGGGCCAACTCCTAC  
 CGTACCTCGCATTACCTTACGCTGAAGAGATGCTCGACTTCTAGAGCACTCGAGATTGGCGTCGGGTCG  
 ATGATATCCCGCGGCCATGCTAGAGTCCGCAAAAATCACCAGTCTCTCTCTACAAATCTATCTCTCTCTA  
 TTTTCTCTCCAGAATAATGTGTGAGTAGTTCCAGATAAGGGAATTAGGGTTCTTATAGGGTTTCGCTCAT  
 GTGTTGAGCATATAAGAAACCTTAGTATGTATTTGTATTTGTAAAATACTTCTATCAATAAAATTTCTA  
 ATTCCTAAAACCAAAATCCAGTGACCTGCAGGCATGCGACGTCGG

\* Sequences with a yellow background are AMIR sequences and those with a blue background are connector sequences.

**Table S1. Primer sequences used in AMIR synthesis.**

| Gene ID<br>(backbone) | Primer ID | Primer Sequences                                                                    |
|-----------------------|-----------|-------------------------------------------------------------------------------------|
| AMIR3a<br>(AMIR171v1) | YRPD0001  | ACA <u><b>ACTAGT</b></u> CCAGGGCGCCCTCACCAAACAAAACCTCACAATGAGAGAGTCCCTGT<br>SpeI    |
|                       | YRPD0107  | GTGTGTGGTCAGGTAAGAAAGGATTCTCATCCGCAATCCAGAACAGGGACTCTCTCA                           |
|                       | YRPD0003  | TTCTTACCTGACCACACACGTAGATATACATTATTCTCTCATGATTAA                                    |
|                       | YRPD0108  | ATTATTCTCTCATGATTAAAGGATTCTCCTCCGCAACCCAGATCAGTACTCTCTCGTCAA                        |
|                       | YRPD0005  | ATTCGCCGCCAAGCTCTTATGTGTGATTACTTACTTTGGTTGACGAGAGAGTACTGA                           |
| AMIRCP<br>(AMIR164v1) | YRPD0006  | AAGAGCTTGGCGGCGAATCACCAAACCTCCACCAACAATGGGTGAGATTCTCCAT                             |
|                       | YRPD0109  | ATTTTCGTGTTTGTGGTTACAGACTGTCCGGCATTCAAGAGAATGGAGAATCTCACC                           |
|                       | YRPD0008  | AACCAACAAACACGAAATCCGTACATTTGCTTATT                                                 |
|                       | YRPD0110  | CCGTACATTTGCTTATTACAGACTGTCAGGCATTCCAGAGAATGAGCACTTCACCCCAA                         |
| AMIRP1<br>(AMIR171v2) | YRPD0010  | GGCGGACTGGGTGCTCAGAGTTCTGTTGGGTAATGGTATTGGGGTGAAGTGCTCAT                            |
|                       | YRPD0011  | CTGAGCACCCAGTCCGCCCACCACCGTCACAGCCAAATACACAGAGTCCCTGT                               |
|                       | YRPD0111  | GTGTGTGGTCAGAAGTGAATTGCTCGGTTGTATAACCAGAGAACAGGGACTCTGTGT                           |
|                       | YRPD013   | TCACTTCTGACCACACACAAGTATTATATATACAGTCTCTACTTTA                                      |
|                       | YRPD0112  | TATACAGTCTCTACTTTAATTGCTCGGTCTGATAACAAGAGATCAGTACTCTGTGTAACA                        |
| AMIRP0<br>(AMIR164v2) | YRPD0015  | GATATAGACGTTGTGGCTGGGTAGAATGTTTGCGGTTTGTGTTACACAGAGTACTGA                           |
|                       | YRPD0016  | AGCCACAACGTCTATATCCACCACACCCACAACTACTCGGCACAGAATGACGAT                              |
|                       | YRPD0113  | ATTTTCGTGAGTTTTTGGTTATCGGTTGTATAACCAGCTTGAGAATCGTCATTCTGTGC                         |
|                       | YRPD0018  | AACCAAACTCACGAAATCCGTCTACAGTTCTTATT                                                 |
|                       | YRPD0114  | CCGTCTACAGTTCTTATTATCGGTTGTACAACCAGCCTGAGAATCTCCTCTTGTGCCAAA                        |
| GUS4                  | YRPD0020  | TGATTAGTTGGGATTGATGGTTTGGCACAAGAGGAGAT                                              |
|                       | YRPD0051  | ATCAATCCCACTAATCAAGGGCGTCGGGTCGAGTGGCAGTGAAGGGCGAAC                                 |
|                       | YRPD0052  | AAT <u><b>CTCGAG</b></u> TGC <u><b>TCTAGA</b></u> AGTCGAGCATCTCTTCAGCG<br>XhoI XbaI |

Sequences with a yellow background are primer sequences designed in AMIRdesigner; sequences with a blue background are connector sequences added for cluster AMIR and GUS sequences by fusion PCR; sequences in bold and underlined encode restriction sites, as indicated below the lines.

**Table S2 The primers used to construct miRNA sensor vector PMS4–amiRCP.**

| Primer ID     | Primer sequence (5'-3')                       |
|---------------|-----------------------------------------------|
| Anti-AMIRCP_F | <u>TCGAGTCT</u> <u>CAGACTGTCCGGCATTCAAGAT</u> |
| Anti-AMIRCP_R | <u>CTAGATCTTGAATGCCGGACAGTCTGAGAC</u>         |

Letters in bold blue form a 5' overhang compatible with XhoI and XbaI digested vector DNA; underlined sequences are complementary in the F and R primers; letters of the F primer and R primer in red encode the amiRCP binding site and its complementary sequences, respectively.

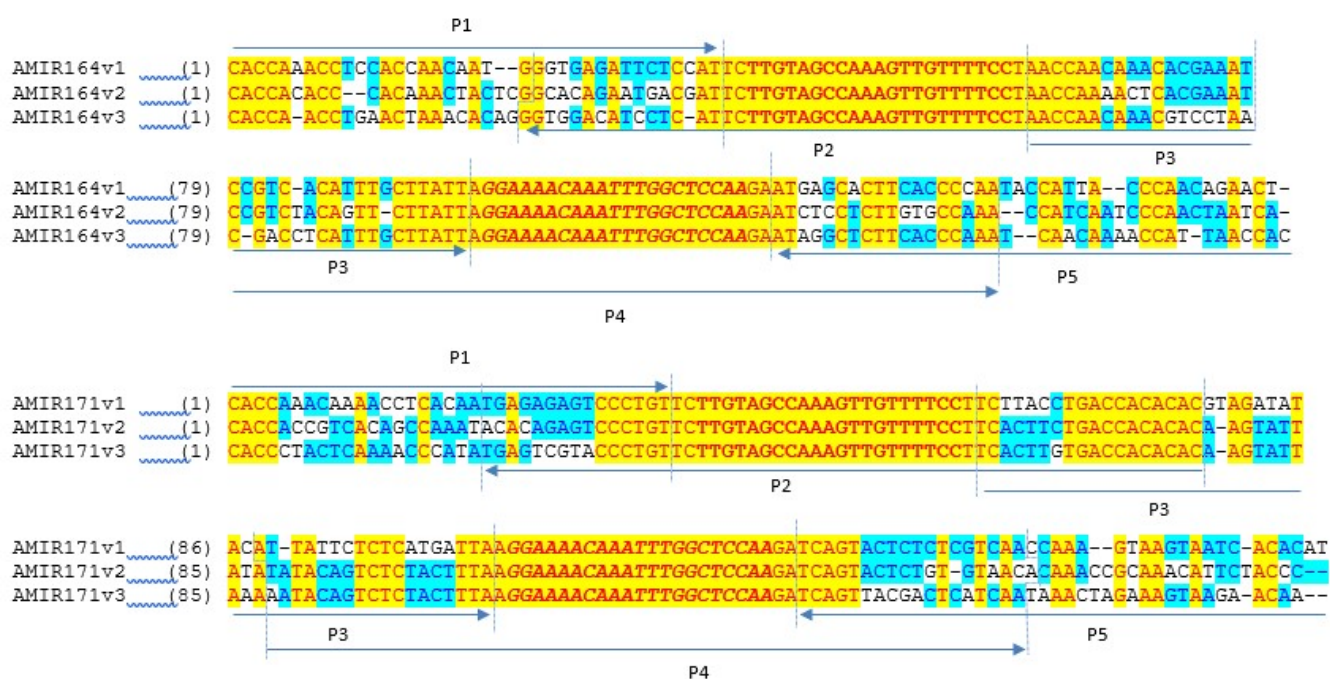

**Figure S1 Sequence alignments of artificial miRNA precursors.** Arrows represent primers P1 to P5, with forward primers pointing to the right and reverse primers pointing to the left. Dashed lines indicate the ends of each primers.

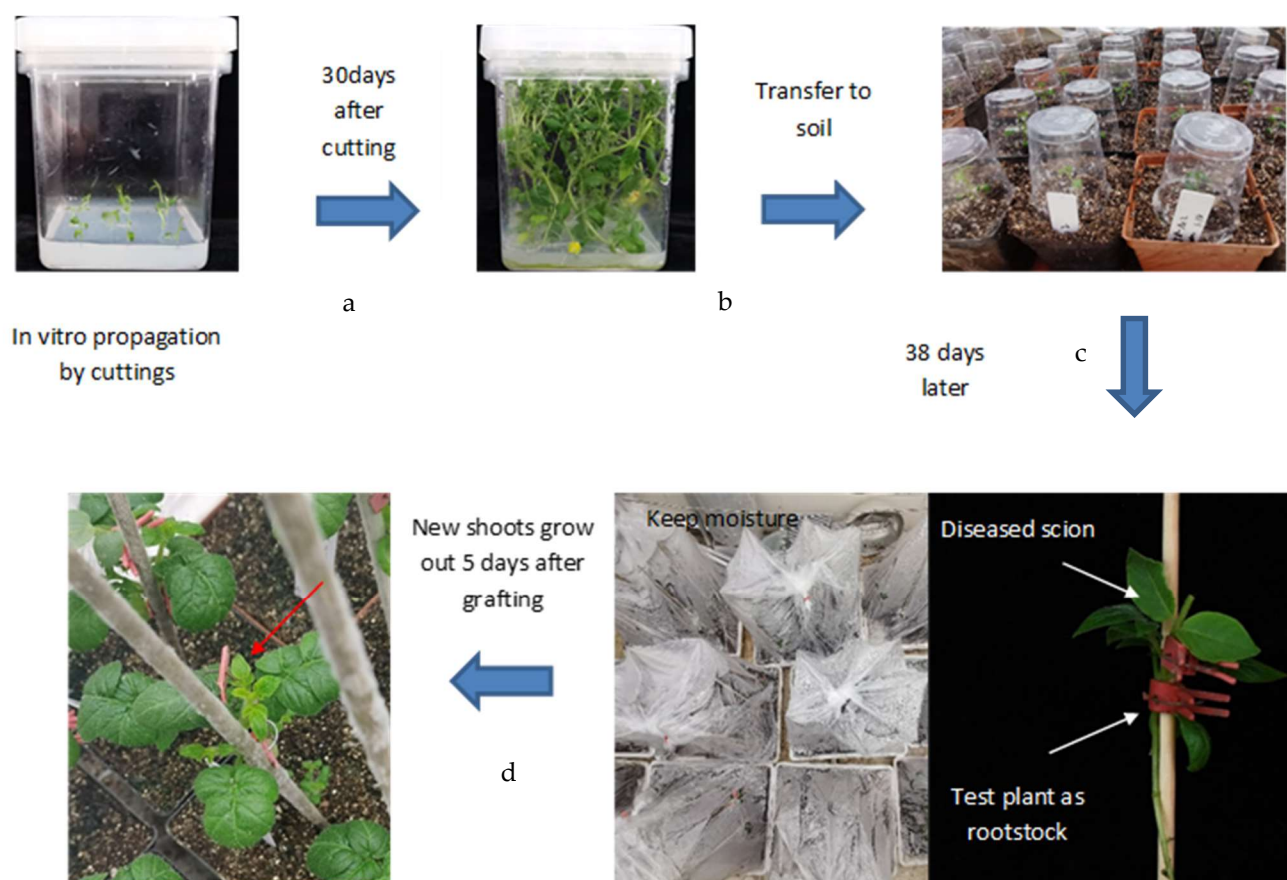

**Figure S2. Workflow for graft inoculation on potato plants.** a) Grow potato seedlings from cutting for 30 days in tissue culture medium; b) transfer potato seedlings to soil; c) 38 days later, transfer potato seedlings to soil, graft diseased scion onto the potato seedlings and retain moisture using plastic cover; d) continue to grow grafted potato plants to allow new shoots to grow.

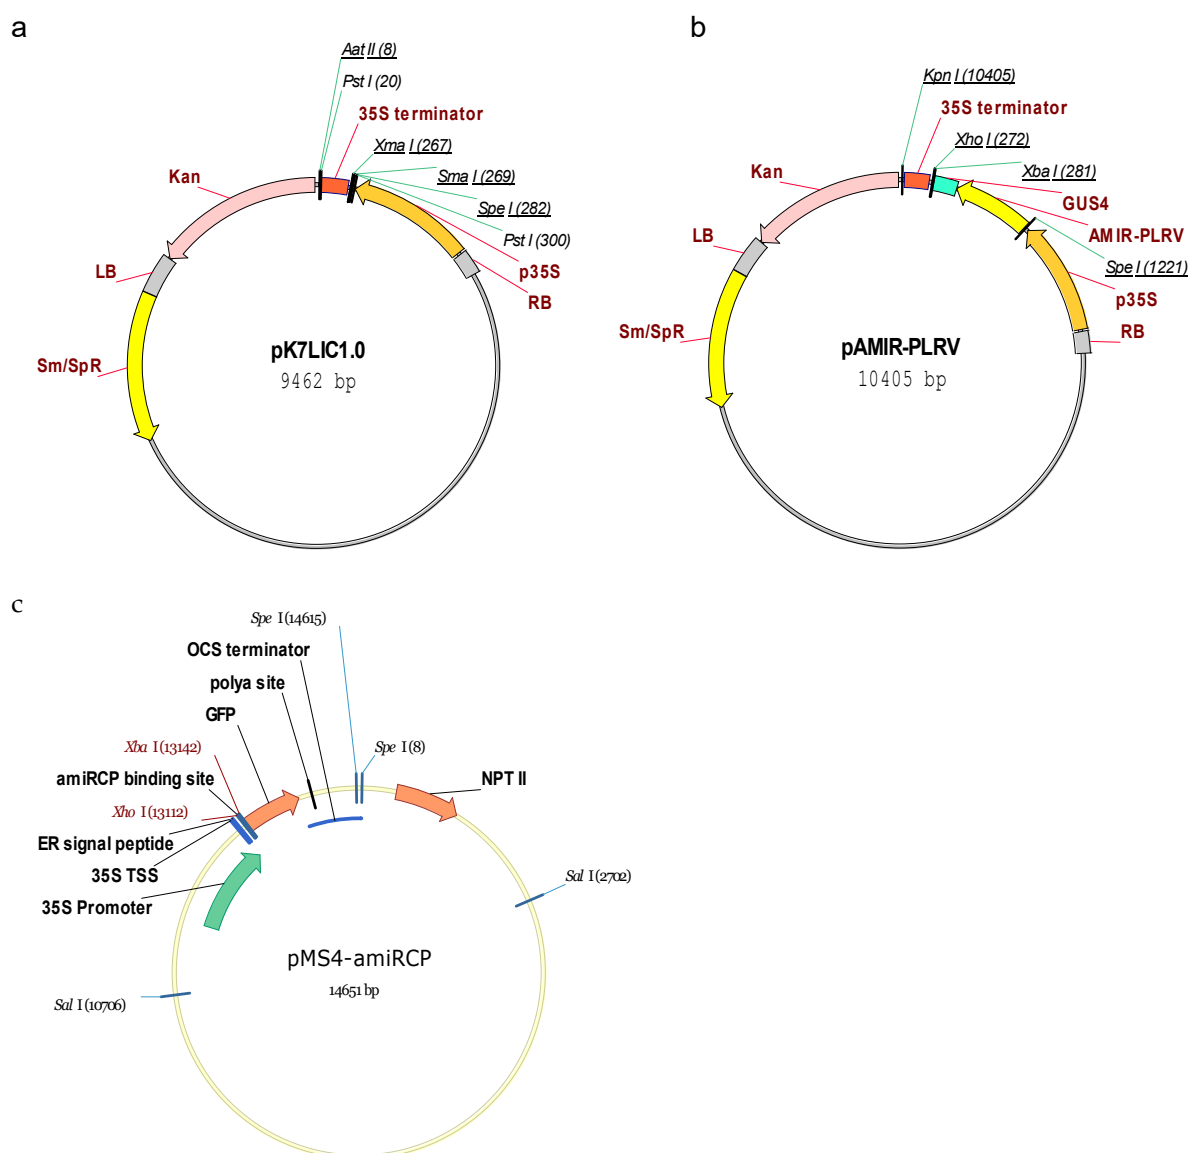

**Figure S3. Restriction maps of vectors used in this study.** a) Vector pK7LIC1.0 was derived from gateway vector pK7WGF2 (VIB—UGent Center for Plant Systems Biology), replacing its LR recombination unit and eGFP with ligation-independent cloning (LIC) sequences. The LIC sequences are split by a SmaI site. SpeI and PstI sites are placed next to the LIC sequences. b) pAMIR-PLRV. The AMIR-PLRV cluster and GUS spacer sequences are shown as yellow arrows and a blue square between the 35S terminator (red square) and 35S promoter (dark yellow arrow). c) pMS4-amiRCP. The amiRCP binding site is flanked by XhoI and XbaI restriction sites.
